# Supplementary material for: A Staphylococcus aureus Proteome Overview: Shared and Specific Proteins and Protein Complexes from Representative Strains of All Three Clades
Source: MDPI journal article supplement (doi:10.3390/proteomes4010008), 2016-02-19
Supplement: s1 [file s1]

**Table S4.** Examples for how Protein complexes may be modified (time, post-translational, ribonucleoproteins). **(a)** Heterogeneous complexes: Ribonucleoproteins; **(b)** Changes over time and in metabolic adaptation. There is variation in protein complexes during time and different modes regulate this.

**(a)**

|                                                                                                                                                                                                                                                                                                                                                                                                                                                                                                                                                |
|------------------------------------------------------------------------------------------------------------------------------------------------------------------------------------------------------------------------------------------------------------------------------------------------------------------------------------------------------------------------------------------------------------------------------------------------------------------------------------------------------------------------------------------------|
| –RNase P in <i>S. aureus</i> : It removes the leader pre-tRNA sequence. It forms a complex with RNaseP protein. In <i>S. aureus</i> even the 3D structure of the RNA P holoenzyme with its single-stranded RNA is known (1D6T; [1])                                                                                                                                                                                                                                                                                                            |
| –tmRNA in <i>S. aureus</i> : SsrA/tmRNA, base pairing to crtMN mRNA, but having an interaction (regulation of translation) with proteins leading to carotenoid pigment <i>crtM</i> and <i>crtN</i> genes, a key feature of pathogenic <i>S. aureus</i> [2]; furthermore, there is also a RNA-protein interaction involved: SmpB (small protein B) can bind <i>ssrA</i> and is involved in <i>ssrA</i> biological function in <i>Escherichia coli</i> ; in <i>S. aureus</i> this is present according to Rfam prediction (RFAM family RF00023). |
| –summary number on sRNAs: thirty are well known and involved in translational but also protein interactions including central regulation of metabolism RsaE [3] to coordinate metabolism when carbon sources get low. New sRNAs have been discovered recently, for instance ArtR [4], which regulates $\alpha$ -toxin expression via the untranslated region of the <i>sarT</i> mRNA.                                                                                                                                                          |

**(b)**

|                                                                                                                                                                                                                                                                                                                                                                                                                                                                                                                                                                                                                                                                                                                                                                     |
|---------------------------------------------------------------------------------------------------------------------------------------------------------------------------------------------------------------------------------------------------------------------------------------------------------------------------------------------------------------------------------------------------------------------------------------------------------------------------------------------------------------------------------------------------------------------------------------------------------------------------------------------------------------------------------------------------------------------------------------------------------------------|
| Example 1: The diauxic shift leads to a reassembly of aldolase and pyruvate dehydrogenase complexes as well as changes the activities of the transaminases, amino acid synthesis complexes etc.                                                                                                                                                                                                                                                                                                                                                                                                                                                                                                                                                                     |
| Example 2: Redox changes affect protein complexes via Rex-family of repressors [5]. This has then impact on numerous protein complexes, in particular global protein synthesis and on the activity of fermentation pathways under aerobic and anaerobic conditions.                                                                                                                                                                                                                                                                                                                                                                                                                                                                                                 |
| Example 3: Anaerobic conditions The <i>Staphylococcus aureus</i> SrrAB two-component system promotes resistance to nitrosative stress and hypoxia. [6].                                                                                                                                                                                                                                                                                                                                                                                                                                                                                                                                                                                                             |
| <b>A general repository:</b> Much more data on these condition-specific proteome changes (without looking at individual protein complexes as analyzed here) can be found in Aureolib [7]. In infection biology of course protection against <i>S. aureus</i> is important, we analyze for this the human monoclonal antibody targeting the conserved staphylococcal antigen IsaA (cleaving peptidoglycan) protects mice against <i>Staphylococcus aureus</i> bacteremia [8]. Interestingly, the IsaA protein is present in all five strains and has a key interaction with SACOL2583 acetyltransferase. Further predicted interactions include a suitable transporter and cell wall protein ScdA. In particular the latter could boost a potential vaccine further. |

## References

1. Spitzfaden, C.; Nicholson, N.; Jones, J.J.; Guth, S.; Lehr, R.; Prescott, C.D.; Hegg, L.A.; Eggleston, D.S. The structure of ribonuclease P protein from *Staphylococcus aureus* reveals a unique binding site for single-stranded RNA. *J. Mol. Biol.* **2000**, *295*, 105–115.
2. Liu, Y.; Wu, N.; Dong, J.; Gao, Y.; Zhang, X.; Shao, N.; Yang, G. SsrA (tmRNA) acts as an antisense RNA to regulate *Staphylococcus aureus* pigment synthesis by base pairing with crtMN mRNA. *FEBS Lett.* **2010**, *584*, 4325–4329.
3. Bohn, C.; Rigoulay, C.; Chabelskaya, S.; Sharma, C.M.; Marchais, A.; Skorski, P.; Borezée-Durant, E.; Barbet, R.; Jacquet, E.; Jacq, A.; *et al.* Experimental discovery of small RNAs in *Staphylococcus aureus* reveals a riboregulator of central metabolism. *Nucleic Acids Res.* **2010**, *38*, 6620–6636.
4. Xue, T.; Zhang, X.; Sun, H.; Sun, B. ArtR, a novel sRNA of *Staphylococcus aureus*, regulates  $\alpha$ -toxin expression by targeting the 5' UTR of *sarT* mRNA. *Med. Microbiol. Immunol.* **2014**, *203*, 1–12.
5. Pagels, M.; Fuchs, S.; Pané-Farré, J.; Kohler, C.; Menschner, L.; Hecker, M.; McNamarra, P.J.; Bauer, M.C.; von Wachenfeldt, C.; Liebeke, M.; *et al.* Redox sensing by a Rex-family repressor is involved in the regulation of anaerobic gene expression in *Staphylococcus aureus*. *Mol. Microbiol.* **2010**, *76*, 1142–1161.
6. Kinkel, T.L.; Roux, C.M.; Dunman, P.M.; Fang, F.C. The *Staphylococcus aureus* SrrAB two-component system promotes resistance to nitrosative stress and hypoxia. *mBio* **2013**, *4*, doi:10.1128/mBio.00696-13.

7. Fuchs, S.; Zühlke, D.; Pané-Farré, J.; Kusch, H.; Wolf, C.; Reiß, S.; le Binh, T.N.; Albrecht, D.; Riedel, K.; Hecker, M.; *et al.*, Aureolib—A proteome signature library: Towards an understanding of *staphylococcus aureus* pathophysiology. *PLoS ONE* **2013**, *8*, e70669.
8. Van den Berg, S.; Bonarius, H.P.; van Kessel, K.P.; Elsinga, G.S.; Kooi, N.; Westra, H.; Bosma, T., van der Kooi-Pol, M.M.; Koedijk, D.G.; Groen, H.; *et al.* A human monoclonal antibody targeting the conserved staphylococcal antigen IsaA protects mice against *Staphylococcus aureus* bacteremia. *Int. J. Med. Microbiol.* **2015**, *305*, 55–64.

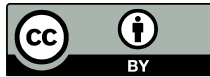

© 2016 by the authors; licensee MDPI, Basel, Switzerland. This article is an open access article distributed under the terms and conditions of the Creative Commons by Attribution (CC-BY) license (<http://creativecommons.org/licenses/by/4.0/>).
