# Supplementary material for: A Staphylococcus aureus Proteome Overview: Shared and Specific Proteins and Protein Complexes from Representative Strains of All Three Clades
Source: MDPI journal article supplement (doi:10.3390/proteomes4010008), 2016-02-19
Supplement: s1 [file s1]

Table S3: Top results generated with AnDom webserver and HH-suite for chosen candidates of *S. aureus*. SACOL0051, SACOL0052, SACOL0238, SACOL0239 and SACOL0694 show distant homology to known proteins with regulatory domains.

| S. aureus candidates |                                                                                                          |                                                                                                                                                                                                                                                                                                                                                                                                                                                                                                                                                                                                                                                                                                                                                                                                                                                                                                                                                                                                                                                                              | AnDom 2.0 webserver                                                                      |                                                                                              |                                                                                        |                                                                                        | HH-suite                                                               |                                                                                                                                                  |                                                                                                                      |                                                                                                                         | Additional information                                                                                                                                 |
|----------------------|----------------------------------------------------------------------------------------------------------|------------------------------------------------------------------------------------------------------------------------------------------------------------------------------------------------------------------------------------------------------------------------------------------------------------------------------------------------------------------------------------------------------------------------------------------------------------------------------------------------------------------------------------------------------------------------------------------------------------------------------------------------------------------------------------------------------------------------------------------------------------------------------------------------------------------------------------------------------------------------------------------------------------------------------------------------------------------------------------------------------------------------------------------------------------------------------|------------------------------------------------------------------------------------------|----------------------------------------------------------------------------------------------|----------------------------------------------------------------------------------------|----------------------------------------------------------------------------------------|------------------------------------------------------------------------|--------------------------------------------------------------------------------------------------------------------------------------------------|----------------------------------------------------------------------------------------------------------------------|-------------------------------------------------------------------------------------------------------------------------|--------------------------------------------------------------------------------------------------------------------------------------------------------|
| Identifier           | Description                                                                                              | Sequence                                                                                                                                                                                                                                                                                                                                                                                                                                                                                                                                                                                                                                                                                                                                                                                                                                                                                                                                                                                                                                                                     | 1. result                                                                                | 2. result                                                                                    | 3. result                                                                              | 4. result                                                                              | 1. result                                                              | 2. result                                                                                                                                        | 3. result                                                                                                            | 4. result                                                                                                               | Regulatory domains                                                                                                                                     |
| SA1642               | Extracellular enterotoxin type G precursor                                                               | 5 10 15 20 25 30 35 40 45 50 55 60<br>MKKLSSTVIIILLIIVFHMNMVUNAPDPKKDELNKVSDYKNGKVTGMGVNMLTSPFVE<br>65 70 75 80 85 90 95 100 105 110 115 120<br>GRGVINSRQFLSHDLIFPIEYKSNEVTELETELANNVKKKVDIFGVFPYFTTCIIPK<br>125 130 135 140 145 150 155 160 165 170 175 180<br>SEPDINQFPGGCCMYGGLFPMSSNERDKLITVQVITDNKQSLGFTTITNKMNVTIQELD<br>185 190 195 200 205 210 215 220 225 230 235 240<br>YKARHMLTEKKLVYEPDGSAPESGYIKTEKNNTSFWFLDPKKELVPPVPVKPLIYIGD<br>245 250 255<br>NRVVDSSKIKMEVFLMTH                                                                                                                                                                                                                                                                                                                                                                                                                                                                                                                                                                                            | SCOP: b.40.2.2<br>Query: 25 - 139 / 258<br>Template: 2 - 119 / 121<br>E-value = 1e-26    | SCOP: d.15.6.1<br>Query: 146 - 256 / 258<br>Template: 2 - 109 / 109<br>E-value = 1e-24       | SCOP: b.40.2.2<br>Query: 141 - 257 / 258<br>Template: 1 - 115 / 117<br>E-value = 2e-23 | SCOP: b.40.2.2<br>Query: 147 - 257 / 258<br>Template: 1 - 112 / 113<br>E-value = 6e-22 | Query: 1 - 255 / 258<br>Template: 10 - 247 / 261<br>E-value = 1.9e-75  | Query: 47 - 256 / 258<br>Template: 30 - 237 / 247<br>E-value = 1.3e-51                                                                           | Query: 87 - 256 / 258<br>Template: 1 - 165 / 167<br>E-value = 2e-50                                                  | Query: 24 - 235 / 258<br>Template: 21 - 220 / 220<br>E-value = 9e-50                                                    | No homologous regulatory domains found                                                                                                                 |
| SA1643               | Enterotoxin SeN                                                                                          | 5 10 15 20 25 30 35 40 45 50 55 60<br>MKNKIKMLRFLYIAAIIITLCLLNNNVNVDKDLKKKSDLSDSKFLNFTSYTDTDI<br>65 70 75 80 85 90 95 100 105 110 115 120<br>WQLDESNIKISTDQLLNTIILKNIDISVLKTSLSKVFNSDLANQFKKNIDIVGLYFG<br>125 130 135 140 145 150 155 160 165 170 175 180<br>NKCVGLTEKTSICLYGGVVIDNQGLDEEKVIGVNVFDDVGQSGFVIKTKAKVTVQEL<br>185 190 195 200 205 210 215 220 225 230 235 240<br>DTKVRFLKLENLYIKNDGNIQGCCIFFPHSHHQDQSFYDILNVKSGVGAEPFQYDSD<br>245 250 255<br>NRTVSSNVHIDVFLYKD                                                                                                                                                                                                                                                                                                                                                                                                                                                                                                                                                                                                   | SCOP: d.15.6.1<br>Query: 147 - 255 / 258<br>Template: 2 - 108 / 109<br>E-value = 6e-24   | SCOP: d.15.6.1<br>Query: 142 - 257 / 258<br>Template: 1 - 115 / 117<br>E-value = 8e-23       | SCOP: d.15.6.1<br>Query: 148 - 257 / 258<br>Template: 1 - 112 / 113<br>E-value = 5e-22 | SCOP: b.40.2.2<br>Query: 50 - 146 / 258<br>Template: 2 - 119 / 120<br>E-value = 5e-22  | Query: 7 - 258 / 258<br>Template: 9 - 252 / 261<br>E-value = 2.5e-74   | Query: 7 - 255 / 258<br>Template: 30 - 237 / 247<br>E-value = 1.1e-56                                                                            | Query: 94 - 258 / 258<br>Template: 1 - 167 / 167<br>E-value = 7.9e-53                                                | Query: 14 - 257 / 258<br>Template: 15 - 262 / 262<br>E-value = 9.2e-53                                                  | No homologous regulatory domains found                                                                                                                 |
| SA1644               | Enterotoxin YENT2                                                                                        | 5 10 15 20 25 30 35 40 45 50 55 60<br>MKTKTCMYGGVTEHGDQIKDNKSTDNSNLIILKVVYERNRSLSFDIPTTKKKNTAQEYDI<br>65 70 75 80 85 90 95 100 105 110 115 120<br>KVRNLLKKNLYEPMSSPYETGYIKTEGSGHSFWDLMPESGKKFYPTKLLIYDNKN<br>125 130 135<br>TVESKSNVEVHLTKK                                                                                                                                                                                                                                                                                                                                                                                                                                                                                                                                                                                                                                                                                                                                                                                                                                  | SCOP: d.15.6.1<br>Query: 21 - 136 / 136<br>Template: 2 - 116 / 117<br>E-value = 2e-25    | SCOP: d.15.6.1<br>Query: 25 - 134 / 136<br>Template: 2 - 109 / 109<br>E-value = 8e-23        | SCOP: d.15.6.1<br>Query: 27 - 135 / 136<br>Template: 2 - 112 / 113<br>E-value = 5e-22  | SCOP: d.15.6.1<br>Query: 25 - 134 / 136<br>Template: 4 - 111 / 112<br>E-value = 5e-22  | Query: 2 - 134 / 136<br>Template: 125-248 / 261<br>E-value = 4.6e-46   | Query: 2 - 136 / 136<br>Template: 37-167 / 167<br>E-value = 9.1e-45                                                                              | Query: 3 - 134 / 136<br>Template: 99-237 / 247<br>E-value = 6.7e-40                                                  | Query: 1 - 136 / 136<br>Template: 1-136 / 136<br>E-value = 1e-39                                                        | No homologous regulatory domains found                                                                                                                 |
| SA1645               | Enterotoxin Yent1                                                                                        | 5 10 15 20 25 30 35 40 45 50 55 60<br>MKLFAFIPICVKSCLFLPMANGPKPEQIHKASPTGLMDNMRYLDDKRVSETNIKSPQE<br>65 70 75 80 85 90 95 100 105 110 115 120<br>KFLQHDLLFKINGSKILKTEPFNNKLSLSQYKXKNVLDLFGNTYNGCYFSLDNMELNDGRL<br>125 130<br>IEKNVYVVRCDRA                                                                                                                                                                                                                                                                                                                                                                                                                                                                                                                                                                                                                                                                                                                                                                                                                                    | SCOP: b.40.2.2<br>Query: 23 - 125 / 133<br>Template: 5 - 112 / 121<br>E-value = 4e-26    | SCOP: b.40.2.2<br>Query: 29 - 113 / 133<br>Template: 2 - 88 / 100<br>E-value = 5e-17         | SCOP: b.40.2.2<br>Query: 21 - 106 / 133<br>Template: 4 - 96 / 120<br>E-value = 8e-17   | SCOP: b.40.2.2<br>Query: 39 - 106 / 133<br>Template: 3 - 70 / 83<br>E-value = 5e-15    | Query: 1 - 112 / 133<br>Template: 10 - 142 / 261<br>E-value = 1.1e-42  | Query: 1 - 133 / 133<br>Template: 10 - 142 / 156<br>E-value = 8.4e-40                                                                            | Query: 19 - 133 / 133<br>Template: 1 - 115 / 115<br>E-value = 7.3e-38                                                | Query: 6 - 113 / 133<br>Template: 17 - 129 / 214<br>E-value = 2.4e-36                                                   | No homologous regulatory domains found                                                                                                                 |
| SA1648               | Enterotoxin SeO                                                                                          | 5 10 15 20 25 30 35 40 45 50 55 60<br>MKNSKVMNLVLLILMLIAICSVNNAYANEEDPKIESLCKSSVDPJALHNINDDYINNKR<br>65 70 75 80 85 90 95 100 105 110 115 120<br>FTTVKSIVSTTEKFLDPLLFSKINMLDQISAEFKDLKVEFSSSAISKEFLGKTVDIYVG<br>125 130 135 140 145 150 155 160 165 170 175 180<br>YYKACSBGHRGVDTACTYGGVTFPEHNNKLSPEKNIGVAVYKDNVNVVITIVTTDKRVKVA<br>185 190 195 200 205 210 215 220 225 230 235 240<br>QELDLKIVTKLNNAYKLVDMNTSDVQKGYIKFHSSEHKESFYDLYTIKGNLPQGYLQI<br>245 250 255<br>YNDNKTIDSSDHYHIDVLYFT                                                                                                                                                                                                                                                                                                                                                                                                                                                                                                                                                                                    | SCOP: d.15.6.1<br>Query: 145 - 260 / 260<br>Template: 1 - 115 / 117<br>E-value = 8e-26   | SCOP: d.15.6.1<br>Query: 151 - 258 / 260<br>Template: 3 - 108 / 109<br>E-value = 8e-26       | SCOP: b.40.2.2<br>Query: 29 - 150 / 260<br>Template: 3 - 120 / 120<br>E-value = 3e-25  | SCOP: d.15.6.1<br>Query: 151 - 260 / 260<br>Template: 1 - 112 / 113<br>E-value = 2e-24 | Query: 25 - 260 / 260<br>Template: 25 - 252 / 261<br>E-value = 1.2e-71 | Query: 1 - 260 / 260<br>Template: 3 - 262 / 262<br>E-value = 7.2e-63                                                                             | Query: 97 - 260 / 260<br>Template: 1 - 166 / 167<br>E-value = 1.4e-52                                                | Query: 47 - 258 / 260<br>Template: 31 - 262 / 247<br>E-value = 5.4e-52                                                  | No homologous regulatory domains found                                                                                                                 |
| SACOL0051            | Hypothetical protein                                                                                     | 5 10 15 20 25 30 35 40 45 50 55 60<br>MEFEHKEKLISEVNNKTEINNVVFFSLGKSSVKAQVKLLKNTYLIKODISKALKFKKK<br>65 70 75 80 85 90 95 100 105 110 115 120<br>SGEFPPEIKLIDVSTSEKILFKELKTLINTRNRYVDGFIAPDSQHNFAVLPEEINANAF<br>125 130 135 140 145 150 155 160 165 170 175 180<br>VRPDNTTEKLPFLSKKNINMYLKRVTNNKASFPSEYNEKEVIFKPYTGQFPGDEBEVHELY<br>185 190 195 200 205 210 215 220 225 230 235 240<br>SEGYKGLKRVLDNWLNEIDQLIESSTFWLQNMLLDNGKVIYGYFPFDFNEIGFVYVLRHS<br>245 250 255 260 265 270 275 280 285 290 295 300<br>SSTYALIEGLSYGKSLQPVKEADIVYILMQLFEIGDKAYIFDDTEEANEIKLGQNASFI<br>305 310 315 320 325 330 335 340 345 350 355 360<br>FAVCEYLKHEDNPKFLSESAQKVAKGILSMIDETTYETHLLNYPDLVSKEKFRIIYDGE<br>365 370 375 380 385 390 395 400 405 410 415 420<br>ALALALLKQDBEMLKMTYVEMLDORSEKKTWYBDRHSCYCNELWYVHQDYKTE<br>425 430 435 440 445 450 455 460 465 470 475 480<br>GKKNVNYLDYIKNRETTFFPLEMNAIYRLVQKADTGREELVNNLIDEQYLIDVNI<br>485 490 495 500 505 510 515 520 525 530 535<br>RADYQRVGFPEIAMIYFNKPSRLISGFFIKHHGVRVRIDIEHYLSGYVQYQLAFNR                                                  | No structural similarity found                                                           |                                                                                              |                                                                                        |                                                                                        | Query: 1 - 538 / 538<br>Template: 8 - 541 / 552<br>E-value = 9.1e-130  | Query: 1 - 537 / 538<br>Template: 11 - 546 / 585<br>E-value = 5.3e-117                                                                           | Query: 22 - 537 / 538<br>Template: 60 - 581 / 1067<br>E-value = 5.3e-117                                             | Query: 20 - 537 / 538<br>Template: 27 - 549 / 1044<br>E-value = 1.3e-99                                                 | 26. result<br>Query: 223 - 404 / 538<br>Template: 431 - 618 / 716<br>E-value = 1.3e-23                                                                 |
| SACOL0052            | Glycosyl transferase, group 1 family protein; identified by match to protein family HMM PF00534          | 5 10 15 20 25 30 35 40 45 50 55 60<br>MIYSVGRNLGNKLIGIEKAMINRHNRLFKNSITSKLIASFASVSPRLHFNASLQIEDDDLL<br>65 70 75 80 85 90 95 100 105 110 115 120<br>SLYDVLGDSINIKSIHKDWITHTWTECHNYTLKFIENTNDIKIYKSNRYMVFHNDNSYQ<br>125 130 135 140 145 150 155 160 165 170 175 180<br>HLDIINHFVNRKIRKIDILNSRQSLSCSLTLTHQKVVCSEIYTFPGGIRKQKFNPEL<br>185 190 195 200 205 210 215 220 225 230 235 240<br>ENSGQILIIYNTDSQKYFNNDQELLAPAEIKLYKNIDGIFLSDKNINIAPIFNNTSETIP<br>245 250 255 260 265 270 275 280 285 290 295 300<br>VLAVLHSTHVKNIDMVESDIKNTYKRVFNMLNRYSGIIVSTQGGQLDISARINNEIPVH<br>305 310 315 320 325 330 335 340 345 350 355 360<br>TIPVYIDEHFNPKNNHNSNNMKIISVARYSPKQLNMQELVSKLIKFEPPHIGLRLY<br>365 370 375 380 385 390 395 400 405 410 415 420<br>GPGKEEKYKQLIYEVNLNENVFLRPGKRNLSAEIQDAYNSLITSNMBGFWLGLLETITE<br>425 430 435 440 445 450 455 460 465 470 475 480<br>GIPPVGVNSKYGPSLELNNNGYLINKNDKELNVRNLLLDKTLRDTFSQECIKHKS<br>485 490 495 500<br>AFSSKIVMKLWEDRFSSTINSSYE                                                                                                            | SCOP: c.87.1.8<br>Query: 329 - 483 / 503<br>Template: 201 - 355 / 370<br>E-value = 9e-07 | Lipopolysaccharide core biosynthesis protein RfaG<br>{ <i>Escherichia coli</i> [Taxid: 562]} | No further structural similarity found                                                 |                                                                                        | Query: 1 - 499 / 503<br>Template: 3 - 505 / 550<br>E-value = 6.8e-91   | Poly(Glycerol-phosphate) alpha-glycosyltransferase; glycosyl transferase; lipopolysaccharide biosynthesis protein...                             | Poly(Glycerol-phosphate) alpha-glycosyltransferase; glycosyl transferase; lipopolysaccharide biosynthesis protein... | Mur ligase middle domain-containing protein; mur ligase middle domain protein.                                          | Six-hairpin glycosidase; transcriptional regulator; glycoside hydrolase family 76; transmembrane protein; glt214; thymidylate kinase.                  |
| SACOL0238            | Teichoic acid biosynthesis protein, putative; identified by match to protein family HMM PF04464          | 5 10 15 20 25 30 35 40 45 50 55 60<br>MKTKQAIHIDNIYERVQLYIEGHSEGDVLTSGQFVLRNLTEKTLLEANMKIDGNTFI<br>65 70 75 80 85 90 95 100 105 110 115 120<br>CRFNVALDDGYLLPMKDYLFVYHDQLEYIQGLNPNIIDQAYALNEEQIEEYNELTQNI<br>125 130 135 140 145 150 155 160 165 170 175 180<br>KGVNVLAYDAKVRKGGVSGHVITITPEIASDVNEVFVDIEITLPQKRSQVIAISAHN<br>185 190 195 200 205 210 215 220 225 230 235 240<br>LKQGHKASFEPSRPLFKAIPIKTLKLIHKSRTILFTSDSRPKLSGNPKYVVDLRLQK<br>245 250 255 260 265 270 275 280 285 290 295 300<br>VDFDVIDKTVFKENIDRRKWRDKFLPYLLGKADYIFVDDFHLIYTVFRPQSQEIYQV<br>305 310 315 320 325 330 335 340 345 350 355 360<br>WHAVGAFKTVGFSRTGKKGGPFIIDSLNHRSTYKAVSSETDIPFYAEAPGIREENVVPTG<br>365 370 375 380 385 390 395 400 405 410 415 420<br>VPRTDVLFDEATATQIKQEMEDLPIIKGKVLIPAPFTFGNGHGTANPPFKLIDPELA<br>425 430 435 440 445 450 455 460 465 470 475 480<br>RYCEKHNAVVLFKMHPFVKNRLMSREHRQYFIDVSDHREVNDILFVTDLLISDYSSLIY<br>485 490 495 500 505 510 515 520 525 530 535 540<br>EYAVFKPMIFYADLEDYIITRDFYEPFESFVPGKIVQSFALMDALDNEDEYEVKVPV<br>545 550 555 560<br>FLDKHFKYQDGSRERLVKDLFRR | No structural similarity found                                                           |                                                                                              |                                                                                        |                                                                                        | Query: 1 - 564 / 564<br>Template: 1 - 562 / 565<br>E-value = 2.2e-125  | Glycosyl/ glycerophosphate transferase; CDP-glycerol: poly(glycerophosphate) glycerophospho-transferase; teichoic acid biosynthesis protein B... | Teichoic acid biosynthesis protein B; teichoic acid biosynthesis family protein.                                     | CDP-glycerol:poly-glycerophosphate transferase; glycosyl transferase, group 2 family.                                   | Teichoic acid biosynthesis protein, putative.                                                                                                          |
| SACOL0239            | TagF domain-containing protein; identified by match to protein family HMM PF04464                        | 5 10 15 20 25 30 35 40 45 50 55 60<br>MIKNTIKKLIHSIYITFKLLSKLPKNKLIYFESPHGQYSDNPKALYEYLTEHSDAGLI<br>65 70 75 80 85 90 95 100 105 110 115 120<br>NGVKVGYEHIPOQNVYPTVKFSKMFILAMPRAKAMINTRTPDWLTKSPKTTLTQWNG<br>125 130 135 140 145 150 155 160 165 170 175 180<br>ETPLKIGLDISNUVLGTQNTQYQDQPKESQRMDLYVSPNPYSTSIQNAFHYVSRDKIL<br>185 190 195 200 205 210 215 220 225 230 235 240<br>TGYPRNDKLSHKNDTEYINGIKTRLNIPLDKKVIMYAPTWRDEAIRREGSYQFNVNF<br>245 250 255 260 265 270 275 280 285 290 295 300<br>IEALQALDDYVILLRMHLYLVTRIDEDHDPVKDVSDEYIDSLYILISDALVTDYSSVM<br>305 310 315 320 325 330 335 340 345 350 355 360<br>PFDGVAERKQIFIALDKYDELRGFDMDIKKELPGQIVENQALIDALKQIDETANEY<br>365 370 375 380 385<br>IEARTVYFQKCSLEDQASRIQCTIFK                                                                                                                                                                                                                                                                                                                                              | No structural similarity found                                                           |                                                                                              |                                                                                        |                                                                                        | Query: 1 - 389 / 389<br>Template: 53 - 433 / 441<br>E-value = 1.9e-57  | Teichoic acid biosynthesis protein F; TagF protein; TagF domain-containing protein; glycosyl transferase...                                      | teichoic acid biosynthesis protein F; CDP-glycerol:Poly(glycerophosphate) glycerophospho-transferase family...       | TagF domain protein; teichoic acid biosynthesis protein; CDP-glycerol:poly(glycerophosphate) glycerophosphotransferase. | Polyglycerol phosphate polymerase; Major teichoic acid biosynthesis protein F; CGPTase; CDP-glycerol:poly(glycerophosphate) glycerophosphotransferase. |
| SACOL0694            | Teichoic acids export protein ATP-binding subunit; with TagG is involved in the export of teichoic acids | 5 10 15 20 25 30 35 40 45 50 55 60<br>MNVSVNKKVTKETRYNNKREMKDALIPHKNNKTFPALDDISLKAYEGDVGILGVGIG<br>65 70 75 80 85 90 95 100 105 110 115 120<br>SKGKSTLNIIGGSLSPYQKVQVNRNGESVIAISAGLSGQLTGIEINIEFHLKMGCFKRKEI                                                                                                                                                                                                                                                                                                                                                                                                                                                                                                                                                                                                                                                                                                                                                                                                                                                                 |                                                                                          |                                                                                              |                                                                                        |                                                                                        |                                                                        |                                                                                                                                                  |                                                                                                                      |                                                                                                                         |                                                                                                                                                        |
