# Supplementary material for: A Staphylococcus aureus Proteome Overview: Shared and Specific Proteins and Protein Complexes from Representative Strains of All Three Clades
Source: MDPI journal article supplement (doi:10.3390/proteomes4010008), 2016-02-19
Supplement: s1 [file s1]

# Supplementary File S1

## A short guide to all Supplementary data files

This guide helps to make the study more accessible and reproducible for the interested reader by providing further detailed data on the results shown in the main paper. It has direct pointers to the genome and proteome comparison data so that all strains can be compared with each other:

We include next in this file a list of all *S. aureus* genomes and their characteristics. After this, their clade distribution follows (Supplementary Table S1). Finally, we reexamine the STRING prediction for *yent1* and 2 for illustration.

In order to keep the study accessible and reproducible, we add for all the conserved protein complexes, Supplementary Table S2, to the supplement. It shows all the proteins (rows) and the strain-specific information in which they occur (columns). As creation of this Table is quite time-consuming (first, do an all-against-all protein comparison among all strains, then identify and annotate conserved proteins, then identify and annotate conserved protein complexes). This table of conserved protein complexes had to be restricted to the first five strains compared. However, the genome comparisons we did so far suggest that these protein complexes are, in fact, found in most of the *S. aureus* strains we know.

However, we give next detailed information on all strain-specific proteins:

We first studied the individual composition of the *S. aureus*-specific complexes in COL. Supplementary Table S3 shows structural composition and analysis of these complexes using the latest version (v. 2015) of our 3D protein prediction tool AnDOM. For 13 of the protein structures in the COL-specific complexes (Figures 5, 8, and 9) we examined how far a structure prediction is possible comparing PSSMs and HMMs and, using a specific database containing all known structural domains, (see Materials and Methods for details). The table contains all information on conserved structure domains found in the infection-relevant *S. aureus* proteins analyzed by AnDOM. For most of the proteins some structure prediction was possible, describing enterotoxins, glycosyltransferases, and a nickel/peptide ABC transporter. The AnDOM predictions in this Supplementary File S4 include the alignment and direct pointers to the connected known 3D structures. Furthermore, predictions from the HH-suite software are given in the table. The most-recent database of non-redundant proteins provided (90 percent sequence identity; date of creation: August of 2011 [1]) was used for sequence augmentation of *S. aureus* sequences in FASTA format. The HH-suite methodology is based on an HMM-HMM comparison algorithm which offers highest sensitivity in the detection of distant homologs and creates alignments with high accuracy [2]. The parameters were defined to create sequence alignments with highest-possible diversity out of the available sequence database. HHblits performed five search iterations with an elevated level of the “neffmax” parameter, which controls target diversity of the resulting alignments.

Next we point out different biological mechanisms leading to dynamic changes in bacterial protein complexes by system adaptation (e.g. aerobic, anaerobic), metabolism, or in ribonucleoproteins (Supplementary File S4).

We compared five strains, COL, HG001, Newman, and USA300 (clade A) to N315 (clade B) regarding their strain-specific proteome (Figure 2). Supplementary File S5 is an Excel file and Table which shows all strain-specific proteins found for each strain regarding this comparison.

Figure 3 shows the proteome comparison between three representative *S. aureus* strains from the three major clades against the background of all strains (*S. aureus* COL (clade A), Mu50 (clade B), and ED133 (clade C). Again, the information for each strain and all its specific proteins is given: Supplementary File S6 is an Excel file and Table, which shows all strain-specific proteins found for this second comparison; several strain-specific complexes are highlighted.

**Table S1.** Completely sequenced *S. aureus* genomes used in this study.

| Clade | <i>S. aureus</i> Strains | Accession   |
|-------|--------------------------|-------------|
| A     | USA300-ISMM51            | NZ_CP007176 |
| A     | VC40                     | NC_016912   |
| A     | ATCC_BAA1680_29b_MRSA    | NC_009641   |
| A     | Newman                   | NC_009641   |
| A     | NRS100                   | NZ_CP007539 |
| A     | COL                      | NC_002951   |
| A     | ATCC_BAA1680_33b_MRSA    | NZ_CP010297 |
| A     | USA300_FPR3757           | NC_007793   |
| A     | 2395_USA500              | NZ_CP007499 |
| A     | ATCC_BAA1680_27b_MRSA    | NZ_CP010300 |
| A     | DSM_20231                | NZ_CP011526 |
| A     | CA15                     | NZ_CP007674 |
| A     | ATCC_BAA1680_31b_MRSA    | NZ_CP010296 |
| A     | Z172                     | NC_022604   |
| A     | T0131                    | NC_017347   |
| A     | Gv69                     | NZ_CP009681 |
| A     | TW20                     | NC_017331   |
| A     | Bmb9393                  | NC_021670   |
| A     | M121                     | NZ_CP007670 |
| A     | USA300_TCH1516           | NC_010079   |
| A     | ATCC_BAA1680_26b_MRSA    | NZ_CP010298 |
| A     | NCTC_8325                | NC_007795   |
| A     | ATCC_BAA1680_25b_MRSA    | NZ_CP010299 |
| B     | 502A_RN6607              | NZ_CP007454 |
| B     | ECT-R_2                  | NC_017343   |
| B     | Mu50                     | NC_002758   |
| B     | Mu3                      | NC_009782   |
| B     | ST228_16035              | NC_020533   |
| B     | ST228_18412              | NC_020537   |
| B     | ST228_10388              | NC_020529   |
| B     | ST228_18583              | NC_020568   |
| B     | ST228_10497              | NC_020532   |
| B     | ST228_18341              | NC_020536   |
| B     | ST228_16125              | NC_020566   |
| B     | ED98                     | NC_013450   |
| B     | 04-02981                 | NC_017340   |
| B     | N315                     | NC_002745   |
| B     | FCFHV36                  | NZ_CP011147 |
| B     | JH1                      | NC_009632   |
| B     | JH9                      | NC_009487   |
| B     | CN1                      | NC_022226   |
| B     | 11819-97                 | NC_017351   |
| B     | H-EMRSA-15               | NZ_CP007659 |
| B     | HO_5096_0412             | NC_017763   |
| B     | RKI4                     | NZ_CP011528 |
| B     | ST772-MRSA-V_DAR4145     | NZ_CP010526 |
| B     | MSSA476                  | NC_002953   |
| B     | MW2                      | NC_003923   |
| C     | 08BA02176                | NC_018608   |
| C     | ST398_S0385              | NC_017333   |

|   |                  |             |
|---|------------------|-------------|
| C | 6850             | NC_022222   |
| C | SA268            | NZ_CP006630 |
| C | SA957            | NC_022442   |
| C | M013             | NC_016928   |
| C | SA40             | NC_022443   |
| C | JKD6159          | NC_017338   |
| C | RF122            | NC_007622   |
| C | CA-347           | NC_021554   |
| C | FORC_001         | NZ_CP009554 |
| C | TCH60_MRSA_TCH60 | NC_017342   |
| C | ATCC_25923       | NZ_CP009361 |
| C | MRSA252          | NC_002952   |
| C | ED133            | NC_017337   |
| C | LGA251           | NC_017349   |

### Reexamining STRING Predictions

Enterotoxin genes *yent2* (*seu*, SA1644), *yent1* (SA1645), *seg* (SA1642), *sen* (SA1643), and *seo* (SA1648) are shown in Figure 6 of the paper. Here we reevaluate the STRING predictions relying on gene-context, gene fusion, and gene co-occurrence that *yent2* and *yent1* form a complex. First of all, these two proteins occur in several *S. aureus* strains, but in many they do not. In the STRING database there are only two strains reported, Mu50 and MSHR1132 (clade B, see below).

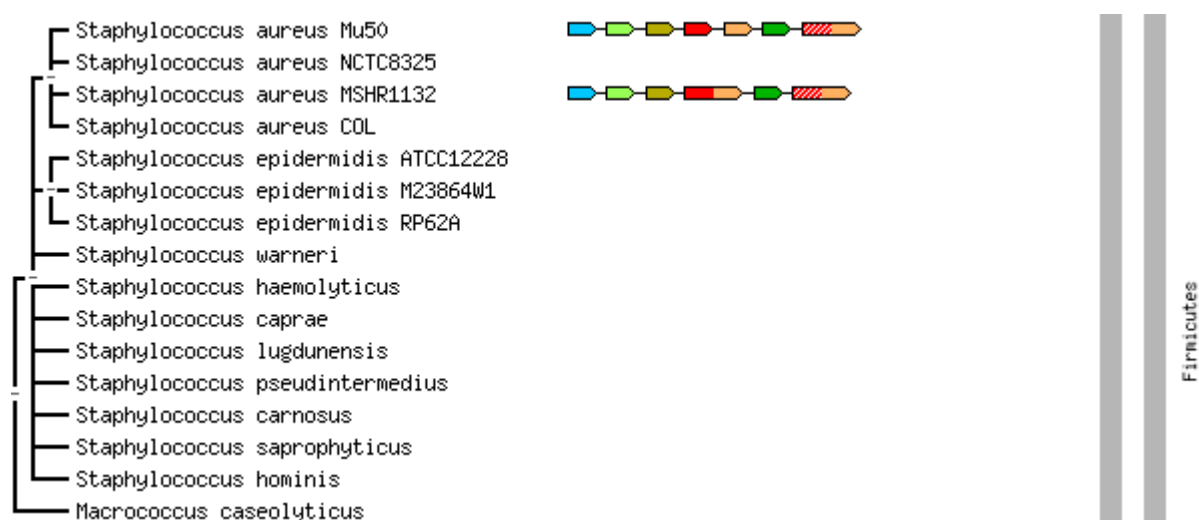

### Your Input:

[yent1](#) Enterotoxin (133 aa)  
(*Staphylococcus aureus* Mu50)

| Neighborhood | Gene Fusion | Cooccurrence | Coexpression | Experiments | Databases | Textmining | [Homology] | Score |
|--------------|-------------|--------------|--------------|-------------|-----------|------------|------------|-------|
|--------------|-------------|--------------|--------------|-------------|-----------|------------|------------|-------|

### Predicted Functional Partners:

|                     |                                           |   |   |   |   |   |   |       |
|---------------------|-------------------------------------------|---|---|---|---|---|---|-------|
| <a href="#">seu</a> | Enterotoxin (136 aa)                      | • | • | • | • | • | • | 0.981 |
| <a href="#">sei</a> | Extracellular enterotoxin type I (242 aa) | • |   |   |   | • | • | 0.912 |
| <a href="#">sem</a> | Enterotoxin (239 aa)                      | • |   |   |   | • | • | 0.870 |
| <a href="#">sen</a> | Enterotoxin (258 aa)                      | • |   | • |   |   |   | 0.821 |

|                                                                                                         |                                      |   |       |
|---------------------------------------------------------------------------------------------------------|--------------------------------------|---|-------|
|  <a href="#">set15</a> | Superantigen-like protein (227 aa)   | • | 0.756 |
|  <a href="#">sel</a>   | Extracellular enterotoxin L (240 aa) | • | 0.753 |
|  <a href="#">seo</a>   | Enterotoxin (260 aa)                 | • | 0.685 |
|  <a href="#">set10</a> | Superantigen-like protein 5 (234 aa) | • | 0.578 |
|  <a href="#">lpl8</a>  | Hypothetical protein (260 aa)        | • | 0.577 |
|  <a href="#">set13</a> | Superantigen-like protein (232 aa)   | • | 0.577 |

Furthermore, though neighborhood supports several more proteins to be in the enterotoxin complex, only for *seu* (*yent2*) there is further evidence from gene fusion and co-occurrence. However, the STRING database compares the evidence it has for a strain-specific complex against a background of more than 2000 organisms (the database currently covers 9,643,763 proteins from 2031 organisms in the current version (Version 10, start of 2016)). Thus, the prediction of an interaction of *yent1* and *yent2* has nevertheless a high confidence level (0.981). The most right column indicates that, in particular, searching the literature can add some more solid evidence. Hence, we then gave further supporting information from literature in the results: as a first observation supporting that the two *yent* proteins really form a complex, these two proteins only occur together in *S. aureus* strains, they are SAPI-encoded and, if they are absent, they are both absent. Regarding the other proteins Seg (SA1642), Sen (SA1643), and Seo (SA1648), there is some evidence for interaction as suggested by gene neighborhood and homology. Furthermore, the proteins Sen and Seo have also co-expression evidence for interaction. Hence, we predict direct physical interaction for proteins Yent1 and Yent2, but only weaker (functional) association for the other three. However, we can probably be even more confident about the complex of the two as Yent1 and Yent2 only function together to yield the functional enterotoxin, otherwise they behave as non-functional pseudogenes (see Ref [3,4])

## Reference

1. Remmert, M.; Biegert, A.; Hauser, A.; Söding, J. HHblits: lightning-fast iterative protein sequence searching by HMM-HMM alignment. *Nat. Methods* **2011**, *9*, 173–175.
2. Söding, J. Protein homology detection by HMM-HMM comparison. *Bioinformatics* **2005**, *21*(7), 951–960.
3. Heymans, F.; Fischer, A.; Stow, N.W.; Girard, M.; Vourexakis, Z.; Des Courtis, A.; Renzi, G.; Huggler, E.; Vlaminc, S.; Bonfils, P.; *et al.* Screening for staphylococcal superantigen genes shows no correlation with the presence or the severity of chronic rhinosinusitis and nasal polyposis. *PLoS ONE* **2010**, *5*, e9525.
4. Letertre, C.; Perelle, S.; Dilasser, F.; Fach, P. Identification of a new putative enterotoxin *Seu* encoded by the *egc* cluster of *Staphylococcus aureus*. *J Appl Microbiol* **2003**, *95*, 38–43.

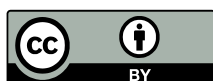

© 2016 by the authors; licensee MDPI, Basel, Switzerland. This article is an open access article distributed under the terms and conditions of the Creative Commons by Attribution (CC-BY) license (<http://creativecommons.org/licenses/by/4.0/>).
